# Supplementary material for: Environmental and epigenetic regulation of Rider retrotransposons in tomato
Source: PLoS Genet. 2019 Sep 16;15(9):e1008370. doi: 10.1371/journal.pgen.1008370 (PMC6762207; doi:10.1371/journal.pgen.1008370)
Supplement: S1 Data — (XLSX) [file pgen.1008370.s020.xlsx]

## Sheet: Figure 2
S1 Data
Figure 2B	Transcript level	Control	Drought
	Replicate 1	0.552865	4.28709
	Replicate 2	1	2.54912
	Replicate 3	1.95884	NA
	Mean	1.17057	3.41811
	SEM	0.414734	0.868986
Figure 2C	Transcript level	Mannitol Control	Mannitol 100 mM	Mannitol 200 mM	Mannitol 300 mM	NaCl Control	NaCl 100 mM	NaCl 200 mM	NaCl 300 mM
	Replicate 1	0.976032	1.3566	1.09429	2.10672	1	5.25977	6.65759	3.93128
	Replicate 2	1	1.18509	2.69447	2.17347	1.29684	5.06303	5.1337	3.66802
	Replicate 3	1.03526	NA	1.15669	NA	0.986233	6.34227	NA	NA
	Mean	1.00377	1.27085	1.64848	2.1401	1.09436	5.55502	5.89565	3.79965
	SEM	0.0172025	0.0857558	0.523302	0.0333738	0.101319	0.397701	0.761943	0.131633
Figure 2D	Transcript level	WT	WT Drought	flc Drought	not Drought	sit Drought
	Replicate 1	1	2.16595	1	1.21419	0.823591
	Replicate 2	1.05336	1.73508	0.870551	1.27456	0.609205
	Replicate 3	NA	1.55294	NA	1.15669	NA
	Mean	1.02668	1.81799	0.935275	1.21515	0.716398
	SEM	0.0266805	0.0910698	0.0647247	0.0340302	0.107193
Figure 2E	Transcript level	WT	ABA 0.5 μM	ABA 5 μM	ABA 10 μM	ABA 100 μM
	Replicate 1	1	1.40444	2.45377	1.56917	4.3318
	Replicate 2	1.37554	1.10191	1.97247	1.84038	4.59468
	Replicate 3	NA	NA	NA	4.42292	NA
	Mean	1.18777	1.25317	2.21312	2.61082	4.46324
	SEM	0.187771	0.15127	0.240652	0.909427	0.131443

## Sheet: Figure 3
Figure 3A	Transcript level	5-Aza Control	5-Aza 50 nM	ABA 100 μM	5-Aza 50 nM + ABA 100 μM
	Replicate 1	1	2.08493	2.45377	2.81864
	Replicate 2	1.32869	1.81504	2.61172	2.52275
	Replicate 3	NA	NA	2.34567	NA
	Mean	1.16434	1.94998	2.47039	2.6707
	SEM	0.164343	0.134947	0.07725	0.147943
Figure 3B	21-22 nt						24 nt
	WT		slnrpd1		slnrpe1		WT		slnrpd1		slnrpe1
	Normalized value	SD	Normalized value	SD	Normalized value	SD	Normalized value	SD	Normalized value	SD	Normalized value	SD
	0.000655817	0.00240017	0.0541942	0.0178894	0.00633178	0.00913838	0.0251081	0.00817948	0	0	0.0358544	0.0108508
Figure 3C	Transcript level	WT	slnrpd1	slnrpe1
	Replicate 1	1	2.53151	2.12874
	Replicate 2	1.19748	2.51403	4.89056
	Replicate 3	NA	2.08493	NA
	Replicate 4	NA	3.605	NA
	Mean	1.09874	2.68387	3.50965
	SEM	0.0987394	0.323943	1.38091

## Sheet: Figure 4
Figure 4B	Copy number	Control	Drought
	Replicate 1	344.892	548.748
	Replicate 2	418.766	530.056
	Replicate 3	317.365	NA
	Mean	360.341	539.402
	SEM	30.2739	9.34619
Figure 4D	Copy number	WT	slnrpd1	slnrpe1
	Replicate 1	312.996	716.588	499.728
	Replicate 2	209.383	524.573	497.999
	Replicate 3	NA	765.363	NA
	Replicate 4	NA	623.826	NA
	Mean	261.189	657.587	498.864
	SEM	51.8065	53.1736	0.864464
Figure 4E	Rider_08_3			Rider_07_2
	WT	slnrpd1	slnrpe1	WT	slnrpd1	slnrpe1
	0.232044	0.0940171	0.0974576	0.193365	0.232481	0.214371
Figure 4F	Rider_08_3						Rider_07_2
	21-22 nt			24 nt			21-22 nt			24 nt
	WT	slnrpd1	slnrpe1	WT	slnrpd1	slnrpe1	WT	slnrpd1	slnrpe1	WT	slnrpd1	slnrpe1
	0	0.0419317	0.00818587	0.0346777	0	0.0245576	0	0.0171949	0.0245576	0.0182107	0	0.0343898

## Sheet: Figure S1
Figure S1A
	LTR identity (%)	100-99	99-98	98-97	97-96	96-95	95-94	94-93	93-92	92-91	91-90	90-89	89-88	88-87	87-86	86-85	85-84	84-83	83-82	82-81	81-80
	n	3	7	9	14	7	5	4	5	6	4	1	1	1	2	0	0	0	1	0	0
Figure S1B	LTR identity (%)	100-99	99-98	98-97	97-96	96-95	95-94	94-93	93-92	92-91	91-90	90-89	89-88	88-87	87-86	86-85	85-84	84-83	83-82	82-81	81-80
	HC	2	3	7	11	5	5	3	4	6	4	1	1	2	2	0	0	0	1	0	0
	EC	1	4	2	3	2	0	1	1	0	0	0	0	0	0	0	0	0	0	0	0

## Sheet: Figure S2
Figure S2A	Transcript level	Control	Drought
	Replicate 1	0.363493	6.40856
	Replicate 2	0.464902	4.06992
	Replicate 3	0.359733	4.78991
	Mean	0.396043	5.08946
	SEM	0.0344468	0.691522
Figure S2B	Transcript level	Mannitol Control	Mannitol 100 mM	Mannitol 200 mM	Mannitol 300 mM
	Replicate 1	1.02811	0.993092	1.28788	1.87905
	Replicate 2	0.91067	0.617709	1.23114	3.02095
	Replicate 3	1.04247	NA	NA	NA
	Replicate 4	0.939523	NA	NA	NA
	Replicate 5	0.936272	NA	NA	NA
	Mean	0.971409	0.805401	1.25951	2.45
	SEM	0.0297963	0.187692	0.0231629	0.57095
Figure S2C	Transcript level	NaCl Control	NaCl 100 mM	NaCl 200 mM	NaCl 300 mM
	Replicate 1	0.325335	0.817902	0.993092	1.68763
	Replicate 2	0.286181	1.16473	1.30134	0.787308
	Replicate 3	NA	1.11342	1.01045	0.719467
	Mean	0.305758	1.03202	1.10163	1.0648
	SEM	0.0195772	0.108078	0.0999823	0.31203
Figure S2D	Transcript level	WT	ABA 0.5 μM	ABA 5 μM	ABA 10 μM	ABA 100 μM
	Replicate 1	0.00361948	0.00186708	0.0101316	0.00358205	0.721965
	Replicate 2	0.00713931	0.00148533	0.0042598	0.00412898	0.776469
	Replicate 3	NA	0.00704102	0.0033076	0.0061722	0.773782
	Mean	0.0053794	0.00346448	0.00589965	0.00462774	0.757405
	SEM	0.00143696	0.00179166	0.00213373	0.000788203	0.0177373
Figure S2E	Transcript level	WT	WT Drought	flc Drought	not Drought	sit Drought
	Replicate 1	0.046039	0.130308	0.184923	0.194791	0.156041
	Replicate 2	0.131124	0.160428	0.216134	0.222982	0.178624
	Replicate 3	0.0125081	0.184923	0.187505	0.179244	0.098073
	Mean	0.0632236	0.158553	0.196188	0.199006	0.144246
	SEM	0.035303	0.0157939	0.00847823	0.0128007	0.0239894
Figure S2F	Transcript level	5-Aza Control	5-Aza 50 nM	ABA 100 μM	5-Aza 50 nM + ABA 100 μM
	Replicate 1	0.181747	0.329877	0.721965	0.962594
	Replicate 2	0.411796	0.0915054	0.776469	0.870551
	Replicate 3	NA	0.202361	0.773782	NA
	Mean	0.296771	0.207914	0.757405	0.916573
	SEM	0.115024	0.068868	0.0177373	0.0460219
Figure S2G	Transcript level	Control	Cold
	Replicate 1	0.0366511	0.0330318
	Replicate 2	0.0551689	0.0631532
	Mean	0.04591	0.0480925
	SEM	0.00925892	0.0150607

## Sheet: Figure S3
Figure S3A	Normalized value	Rider (all)	Rider (98-100)	Rider (95-98)	Rider (80-95)	Rider (euchromatin)	Rider (heterochromatin)		SD	Rider (all)	Rider (98-100)	Rider (95-98)	Rider (80-95)	Rider (euchromatin)	Rider (heterochromatin)
	WT	0.000655817	0	0.000636261	0.000878482	0	0.000816894		WT	0.00240017	0	0.00237915	0.00277586	0	0.0026584
	WT (CAS9)	0.000503594	0	0.000918268	0.000285169	0.000634718	0.000471388		WT (CAS9)	0.00207668	0	0.00275268	0.00161316	0.0023749	0.00201894
	slnrpd1	0.0541942	0.0669076	0.0527679	0.0515138	0.0639766	0.0517915		slnrpd1	0.0178894	0.0175424	0.0161977	0.0182995	0.0158348	0.0176644
	slnrpe1	0.00633178	0.0150589	0.00581183	0.00407575	0.0144183	0.00434562		slnrpe1	0.00913838	0.0123263	0.00968625	0.00544437	0.0140212	0.0061957
Figure S3B	Normalized value	Rider (all)	Rider (98-100)	Rider (95-98)	Rider (80-95)	Rider (euchromatin)	Rider (heterochromatin)		SD	Rider (all)	Rider (98-100)	Rider (95-98)	Rider (80-95)	Rider (euchromatin)	Rider (heterochromatin)
	WT	0.0251081	0.0320627	0.0256235	0.0224677	0.032151	0.0233783		WT	0.00817948	0.00824799	0.00734654	0.00771538	0.00863751	0.00713192
	WT (CAS9)	0.0240583	0.0245556	0.0250121	0.0230385	0.0292049	0.0227942		WT (CAS9)	0.00744588	0.00840106	0.00742393	0.0072742	0.00737073	0.00695998
	slnrpd1	0	0	0	0	0	0		slnrpd1	0	0	0	0	0	0
	slnrpe1	0.0358544	0.0338332	0.038014	0.0345289	0.0383333	0.0352456		slnrpe1	0.0108508	0.0101883	0.0107927	0.0110916	0.00836774	0.0113581
Figure S3C	Methylation level	CG	CHG	CHH		SD	CG	CHG	CHH
	WT	0.941532	0.848084	0.201855		WT	0.015935	0.0640035	0.0784958
	slnrpd1	0.853509	0.78443	0.193587		slnrpd1	0.301071	0.120394	0.0807972
	slnrpe1	0.862615	0.818673	0.193288		slnrpe1	0.303881	0.113234	0.0720884
Figure S3D	CHH methylation level	Rider (all)	Rider (98-100)	Rider (95-98)	Rider (80-95)	Rider (euchromatin)	Rider (heterochromatin)
	WT	0.203553	0.267785	0.201855	0.18502	0.281075	0.184513
	slnrpd1	0.197805	0.217366	0.193587	0.195514	0.263172	0.18175
	slnrpe1	0.191921	0.229988	0.193288	0.178872	0.298241	0.169538

## Sheet: Figure S4
Figure S4C		Rider_08_3			Rider_07_2
	CHH methylation level	LTR 5'	Body	LTR 3'	LTR 5'	Body	LTR 3'
	WT	0.384615	0	0.234177	0.21393	0.19267	0.185714
	slnrpd1	0.030303	NA	0.108374	0.22093	0.215145	0.191919
	slnrpe1	0	0.0666667	0.108696	0.24	0.215865	0.454545
Figure S4D	CG methylation level	Rider_08_3	Rider_07_2
	WT	0.924559	0.941532
	slnrpd1	0.916378	0.853509
	slnrpe1	0.933607	0.862615
Figure S4E	CHG methylation level	Rider_08_3	Rider_07_2
	WT	0.843708	0.848084
	slnrpd1	0.854953	0.78443
	slnrpe1	0.862807	0.818673
Figure S4F		Rider_08_3		Rider_07_2
	Normalized value	LTR	Body	LTR	Body
	WT	0.159023	0.0310937	0.148573	0.0207546
	WT (CAS9)	0.10469	0.02047	0.146715	0.0204952
	slnrpd1	0	0	0	0
	slnrpe1	0.100102	0.0293593	0.140286	0.0391939
Figure S4G		Rider_08_3		Rider_07_2
	Normalized value	LTR	Body	LTR	Body
	WT	0	0	0	0
	WT (CAS9)	0	0	0	0
	slnrpd1	0.064096	0.0501306	0.0901421	0.0627403
	slnrpe1	0	0.019597	0	0.00978645
